# Supplementary material
Source: PubMed Central journal article supplement (PMC3465015)
Supplement: supp_12-10385_IOVS-12-10385-s04.pdf [file supp_12-10385_IOVS-12-10385-s04.pdf]

| Gene Symbol | Key   | Gene Name                                                 | FC     | p-value |
|-------------|-------|-----------------------------------------------------------|--------|---------|
| Zranb3      |       | zinc finger, RAN-binding domain containing 3              | 10.90  | 4.3E-07 |
| Shisa4      | ♣     | shisa homolog 4 ( <i>Xenopus laevis</i> )                 | -2.93  | 8.2E-07 |
| Timm17a     | ♣     | translocase of inner mitochondrial membrane 17a           | -3.04  | 7.3E-07 |
| Tsn         | ♣     | translin                                                  | -3.29  | 1.1E-06 |
| Ppp1r12b    | ♣     | protein phosphatase 1, regulatory (inhibitor) subunit 12B | -3.76  | 3.2E-06 |
| Cdh7        | ♣     | cadherin 7, type 2                                        | -4.25  | 1.6E-07 |
| BC026782    | ♣     | cDNA sequence BC026782                                    | -5.28  | 3.7E-06 |
| Zc3h11a     | ♣     | zinc finger CCCH type containing 11A                      | -5.91  | 8.5E-08 |
| Kdm5b       | ♣     | lysine (K)-specific demethylase 5B                        | -7.21  | 3.1E-08 |
| Dars        | ♣ *   | aspartyl-tRNA synthetase                                  | -8.65  | 1.3E-06 |
| Cfh         | ♣ Ψ * | complement component factor h                             | -17.74 | 7.9E-07 |
| EG214403    | ♣ *   | predicted gene, EG214403                                  | -28.32 | 2.2E-08 |

**Supplementary Table S4. Genes differentially expressed in the neuroretina of young *Cfh*<sup>-/-</sup> mice.** Microarray analysis revealed which genes were significantly differentially expressed in the neuroretina of young *Cfh*<sup>-/-</sup> mice compared to age-matched wild-type controls. Genes listed in fold change (FC) order. Key: ♣, gene remains differentially expressed in aged *Cfh*<sup>-/-</sup> neuroretina in comparison to age-matched wild-type controls; Ψ, gene also differentially expressed in RPE/choroid of *Cfh*<sup>-/-</sup> mice when compared to age matched wild-type controls; \*, large gene with more than one probe set that showed significant differential expression.
