# Supplementary material
Source: PubMed Central journal article supplement (PMC3465015)
Supplement: supp_12-10385_IOVS-12-10385-s05.pdf [file supp_12-10385_IOVS-12-10385-s05.pdf]

| Gene Symbol   | Key | Gene Name                                                                         | FC    | p-value |
|---------------|-----|-----------------------------------------------------------------------------------|-------|---------|
| Slu7          |     | SLU7 splicing factor homolog ( <i>S. cerevisiae</i> )                             | 36.57 | 7.0E-12 |
| Pttg1         | Ψ * | pituitary tumor-transforming gene 1                                               | 22.58 | 5.5E-07 |
| 5830417110Rik | Ψ * | RIKEN cDNA 5830417110 gene                                                        | 16.62 | 6.4E-09 |
| Ublcp1        |     | ubiquitin-like domain containing CTD phosphatase 1                                | 16.12 | 1.2E-10 |
| Itgav         | *   | integrin alpha V                                                                  | 13.55 | 4.6E-06 |
| Gm16432       | *   | predicted gene 16432                                                              | 9.04  | 2.1E-06 |
| Pde4b         |     | phosphodiesterase 4B, cAMP specific                                               | 8.88  | 6.1E-08 |
| Glr1          |     | glycine receptor, alpha 1 subunit                                                 | 8.30  | 7.7E-07 |
| Grm6          |     | glutamate receptor, metabotropic 6                                                | 8.23  | 4.1E-05 |
| Ush2a         |     | Usher syndrome 2A (autosomal recessive, mild) homolog (human)                     | 8.05  | 9.8E-08 |
| Afg3l2        |     | AFG3(ATPase family gene 3)-like 2 (yeast)                                         | 7.72  | 1.1E-08 |
| Anxa6         |     | annexin A6                                                                        | 7.27  | 6.2E-08 |
| Atox1         |     | ATX1 (antioxidant protein 1) homolog 1 (yeast)                                    | 7.01  | 1.1E-08 |
| Cgn           |     | cingulin-like 1                                                                   | 6.81  | 2.3E-05 |
| Wdr78         |     | WD repeat domain 78                                                               | 5.81  | 6.6E-06 |
| Pgm2          |     | phosphoglucomutase 2                                                              | 5.80  | 1.0E-06 |
| Frzb          |     | frizzled-related protein                                                          | 5.74  | 2.8E-09 |
| Ssfa2         |     | sperm specific antigen 2                                                          | 5.25  | 2.2E-05 |
| Olf550        |     | olfactory receptor 550                                                            | 5.03  | 1.7E-05 |
| Lrba          |     | LPS-responsive beige-like anchor                                                  | 4.69  | 2.8E-10 |
| Cdc16         |     | CDC16 cell division cycle 16 homolog ( <i>S. cerevisiae</i> )                     | 4.42  | 3.5E-06 |
| Slc36a1       |     | solute carrier family 36 (proton/amino acid symporter), member 1                  | 4.10  | 1.1E-05 |
| Ptprj         |     | protein tyrosine phosphatase, receptor type, J                                    | 3.98  | 1.3E-06 |
| Aldh1a2       |     | aldehyde dehydrogenase family 1, subfamily A2                                     | 3.91  | 3.8E-05 |
| Cdh2          |     | cadherin-like 24                                                                  | 3.79  | 4.6E-05 |
| Nfia          |     | nuclear factor I/A                                                                | 3.51  | 3.5E-06 |
| Fstl5         |     | follistatin-like 5                                                                | 3.46  | 9.6E-07 |
| Ash1l         |     | ash1 (absent, small, or homeotic)-like ( <i>Drosophila</i> )                      | 3.31  | 5.3E-07 |
| Ccl21a        | *   | chemokine (C-C motif) ligand 21A                                                  | 3.29  | 4.9E-06 |
| G3bp1         |     | Ras-GTPase-activating protein SH3-domain binding protein 1                        | 3.27  | 8.6E-06 |
| Fbxw7         |     | F-box and WD-40 domain protein 7                                                  | 3.23  | 1.3E-07 |
| Spire1        | *   | spire homolog 1 ( <i>Drosophila</i> )                                             | 3.17  | 7.6E-07 |
| 4933409K07Rik | Ψ * | RIKEN cDNA 4933409K07 gene                                                        | 3.12  | 4.4E-06 |
| Arhgef2       |     | rho/rac guanine nucleotide exchange factor (GEF) 2                                | 3.08  | 9.1E-06 |
| Vdac1         |     | voltage-dependent anion channel 1                                                 | 3.07  | 4.1E-08 |
| Trak1         |     | trafficking protein, kinesin binding 1                                            | 3.07  | 9.8E-06 |
| Nav1          |     | neuron navigator 1                                                                | 3.03  | 4.2E-05 |
| Hnrpd1        |     | heterogeneous nuclear ribonucleoprotein D-like                                    | 2.99  | 4.4E-09 |
| Stard6        |     | StAR-related lipid transfer (START) domain containing 6                           | 2.79  | 3.6E-05 |
| Pet112l       |     | PET112-like (yeast)                                                               | 2.65  | 1.7E-06 |
| Pogz          |     | pogo transposable element with ZNF domain                                         | 2.59  | 2.0E-06 |
| Rapgef2       |     | Rap guanine nucleotide exchange factor (GEF) 2                                    | 2.59  | 1.1E-06 |
| Hnrmp1        |     | heterogeneous nuclear ribonucleoprotein H1                                        | 2.45  | 6.7E-08 |
| Casz1         |     | castor homolog 1, zinc finger ( <i>Drosophila</i> )                               | 2.45  | 9.2E-06 |
| Alg6          |     | asparagine-linked glycosylation 6 homolog (yeast, alpha-1,3,-glucosyltransferase) | 2.40  | 1.2E-05 |
| Cd164         |     | CD164 antigen                                                                     | 2.39  | 4.3E-07 |
| Lgr5          |     | leucine rich repeat containing G protein coupled receptor 5                       | 2.32  | 4.4E-05 |
| D030074E01Rik |     | RIKEN cDNA D030074E01 gene                                                        | 2.17  | 3.2E-05 |
| Gabrg2        |     | gamma-aminobutyric acid (GABA) A receptor, subunit gamma 2                        | 2.06  | 3.7E-06 |
| Tbc1d15       |     | TBC1 domain family, member 15                                                     | 1.87  | 1.4E-05 |
| Rps6          |     | ribosomal protein S6 kinase polypeptide 3                                         | 1.80  | 1.3E-09 |
| Pde8b         |     | phosphodiesterase 8B                                                              | 1.78  | 3.4E-06 |
| Poli          |     | poliovirus receptor-related 1                                                     | 1.71  | 1.7E-05 |
| Zc3h15        |     | zinc finger CCCH-type containing 15                                               | 1.60  | 6.2E-09 |
| Zfp2          |     | zinc finger protein 26                                                            | 1.54  | 1.8E-05 |

|                |       |                                                                                                  |        |         |
|----------------|-------|--------------------------------------------------------------------------------------------------|--------|---------|
| Mta2           |       | metastasis-associated gene family, member 2                                                      | 1.50   | 9.6E-06 |
| Ctnna1         |       | catenin (cadherin associated protein), alpha 1                                                   | 1.44   | 3.6E-05 |
| Asns           |       | asparagine synthetase domain containing 1                                                        | 1.41   | 1.3E-06 |
| Clasp1         |       | CLIP associating protein 1                                                                       | 1.34   | 3.1E-05 |
| Creb1          |       | cAMP responsive element binding protein 1                                                        | 1.31   | 1.5E-06 |
| Cp             |       | ceruloplasmin                                                                                    | 1.17   | 2.9E-06 |
| Tmeff1         |       | transmembrane protein with EGF-like and two follistatin-like domains 1                           | -1.23  | 2.5E-05 |
| Guf1           |       | GUF1 GTPase homolog ( <i>S. cerevisiae</i> )                                                     | -1.30  | 2.5E-05 |
| C030002C11Rik  |       | hypothetical LOC320400                                                                           | -1.33  | 3.9E-05 |
| 1700047I17Rik1 | *     | RIKEN cDNA 1700047I17 gene 1                                                                     | -1.35  | 4.4E-05 |
| Rabif          |       | RAB interacting factor                                                                           | -1.35  | 2.3E-05 |
| Xpa            |       | xeroderma pigmentosum, complementation group A                                                   | -1.36  | 7.4E-06 |
| Snx24          |       | sorting nexin 24                                                                                 | -1.41  | 2.8E-05 |
| Zdhhc3         |       | zinc finger, DHHC domain containing 3                                                            | -1.41  | 1.7E-05 |
| Dnajc10        |       | DnaJ (Hsp40) homolog, subfamily C, member 10                                                     | -1.42  | 3.3E-07 |
| Cnot10         |       | CCR4-NOT transcription complex, subunit 10                                                       | -1.48  | 1.7E-05 |
| Pin4           |       | protein (peptidyl-prolyl cis/trans isomerase) NIMA-interacting, 4 (parvulin)                     | -1.48  | 2.1E-05 |
| Mest           | *     | mesoderm specific transcript                                                                     | -1.48  | 2.2E-05 |
| Cd59a          |       | CD59a antigen                                                                                    | -1.49  | 9.7E-06 |
| D14Ert449e     | *     | DNA segment, Chr 14, ERATO Doi 449, expressed                                                    | -1.62  | 2.4E-06 |
| Slc26a7        |       | solute carrier family 26, member 7                                                               | -1.75  | 7.3E-07 |
| Rbm45          |       | RNA binding motif protein 45                                                                     | -1.78  | 4.1E-05 |
| BC016201       |       | cDNA sequence BC016201                                                                           | -1.82  | 1.6E-06 |
| Anks1b         |       | ankyrin repeat and sterile alpha motif domain containing 1B                                      | -2.07  | 5.1E-06 |
| Higd1a         |       | HIG1 domain family, member 1A                                                                    | -2.30  | 1.6E-12 |
| Dynlt1         | Ψ *   | dynein light chain Tctex-type 1                                                                  | -2.32  | 1.4E-05 |
| Cerkl          | *     | ceramide kinase-like                                                                             | -2.39  | 5.5E-06 |
| Smc2           |       | structural maintenance of chromosomes 2                                                          | -2.41  | 9.7E-06 |
| Cfhr3          |       | complement factor H-related 3                                                                    | -2.43  | 2.5E-05 |
| Itga4          | *     | integrin alpha 4                                                                                 | -2.45  | 3.0E-06 |
| Ucma           |       | upper zone of growth plate and cartilage matrix associated                                       | -2.49  | 9.0E-06 |
| Arpc5          |       | actin related protein 2/3 complex, subunit 5-like                                                | -2.59  | 1.1E-05 |
| Shisa4         | ♣     | shisa homolog 4 ( <i>Xenopus laevis</i> )                                                        | -2.64  | 1.1E-06 |
| Rgl1           |       | ral guanine nucleotide dissociation stimulator,-like 1                                           | -2.64  | 2.0E-05 |
| Tsn            | ♣     | translin                                                                                         | -2.68  | 3.2E-06 |
| Gatm           |       | glycine amidinotransferase (L-arginine:glycine amidinotransferase)                               | -2.75  | 3.6E-05 |
| Tmem144        |       | transmembrane protein 144                                                                        | -3.12  | 1.6E-05 |
| Dpp10          |       | dipeptidylpeptidase 10                                                                           | -3.20  | 3.9E-05 |
| Nmnat1         | *     | nicotinamide nucleotide adenyltransferase 1                                                      | -3.40  | 1.9E-05 |
| Timm17a        | ♣     | translocase of inner mitochondrial membrane 17a                                                  | -3.49  | 1.0E-07 |
| Ppp1r12b       | ♣     | protein phosphatase 1, regulatory (inhibitor) subunit 12B                                        | -3.54  | 2.4E-06 |
| Cdh7           | ♣     | cadherin 7, type 2                                                                               | -4.19  | 7.9E-08 |
| Lyrm7          | *     | LYR motif containing 7                                                                           | -4.66  | 2.0E-06 |
| Dars           | ♣ *   | aspartyl-tRNA synthetase                                                                         | -4.75  | 9.6E-06 |
| Mcm6           | Ψ *   | minichromosome maintenance deficient 6 (MIS5 homolog, <i>S. pombe</i> ) ( <i>S. cerevisiae</i> ) | -5.05  | 7.5E-06 |
| Ube2t          | *     | ubiquitin-conjugating enzyme E2T (putative)                                                      | -5.33  | 2.9E-05 |
| Dbi            | Ψ     | diazepam binding inhibitor                                                                       | -6.81  | 2.6E-06 |
| Kdm5b          | ♣     | lysine (K)-specific demethylase 5B                                                               | -6.90  | 1.7E-08 |
| Zc3h11a        | ♣     | zinc finger CCCH type containing 11A                                                             | -7.39  | 1.1E-08 |
| Cfhr2          | ♣ *   | complement factor H-related 2                                                                    | -10.14 | 2.5E-06 |
| Cacna1s        |       | calcium channel, voltage-dependent, L type, alpha 1S subunit                                     | -11.39 | 1.4E-05 |
| Btn19          |       | butyrophilin-like 9                                                                              | -14.55 | 4.4E-08 |
| Snca           | Ψ *   | synuclein, alpha                                                                                 | -19.11 | 3.8E-07 |
| Cfh            | ♣ Ψ * | complement component factor h                                                                    | -22.76 | 1.0E-06 |
| EG214403       | ♣ *   | predicted gene, EG214403                                                                         | -28.09 | 1.0E-08 |

4 **Supplementary Table S5. Genes differentially expressed in neuroretina of aged *Cfh*<sup>-/-</sup> mice.**  
5 Microarray analysis revealed which genes were significantly differentially expressed in the  
6 neuroretina of aged *Cfh*<sup>-/-</sup> mice compared to age-matched wild-type controls. Genes listed in fold  
7 change (FC) order. Key: ♣, gene also differentially expressed in young) *Cfh*<sup>-/-</sup> neuroretina in  
8 comparison to age-matched wild-type controls; Ψ, gene also differentially expressed in  
9 RPE/choroid of *Cfh*<sup>-/-</sup> mice when compared to age matched wild-type controls; \*, large gene with  
10 more than one probe set that showed significant differential expression.
